# Supplementary material
Source: PubMed Central journal article supplement (PMC3910995)
Supplement: AEM.02987-13_zam999105018so1.pdf [file AEM.02987-13_zam999105018so1.pdf]

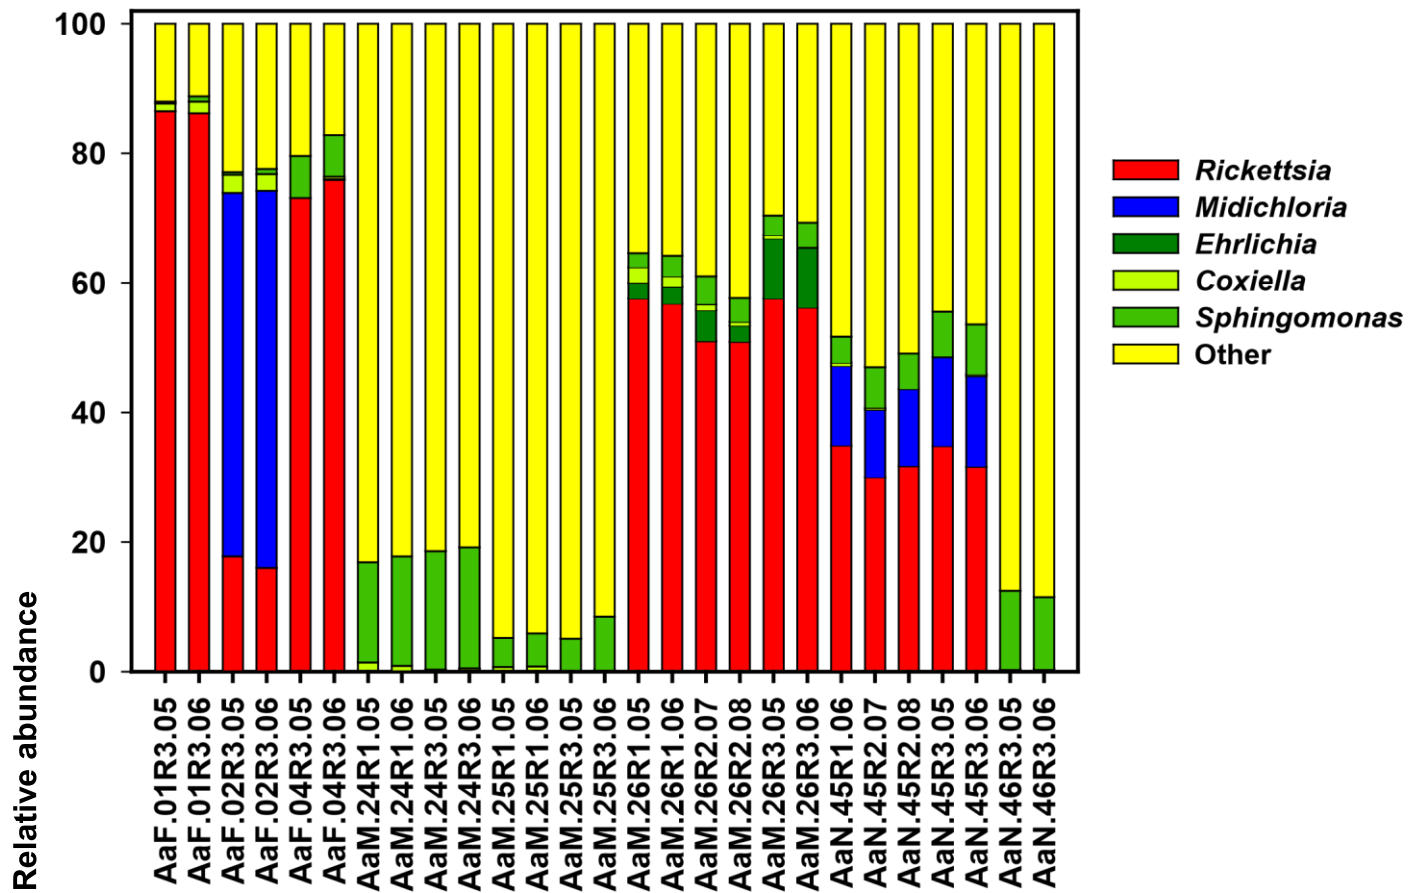

**Figure S1.** Reproducibility of distribution between replicates before data for individual ticks were merged. Each bar is labeled with the tick number followed by the analysis label.

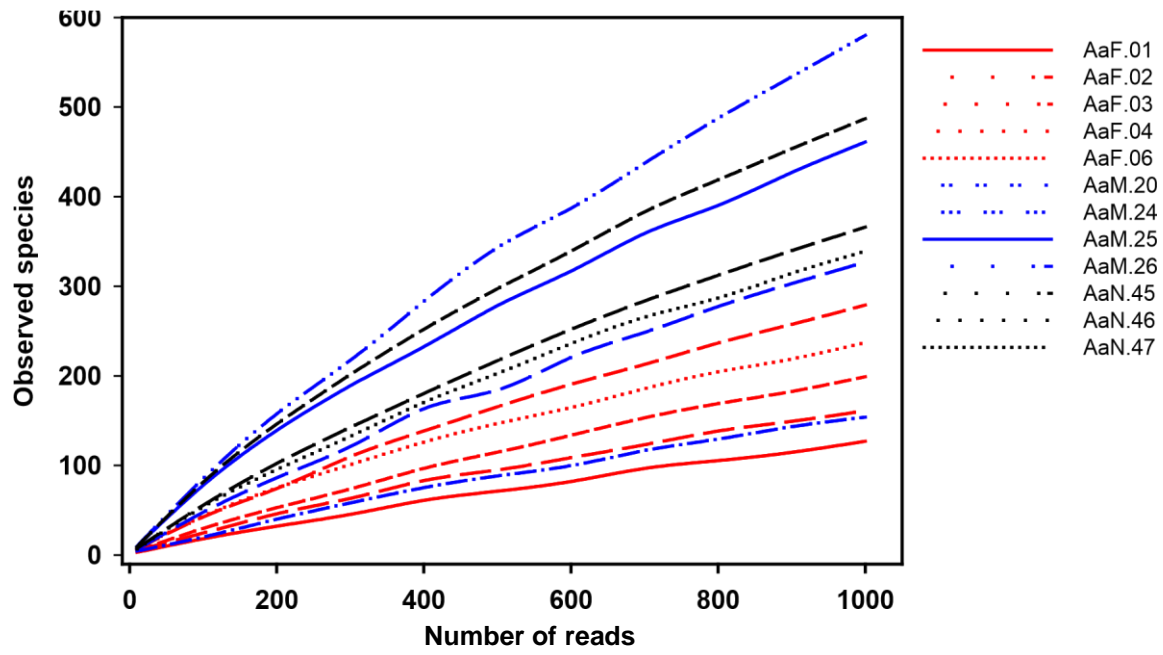

**Figure S2.** Rarefaction curves of observed species in individual ticks.

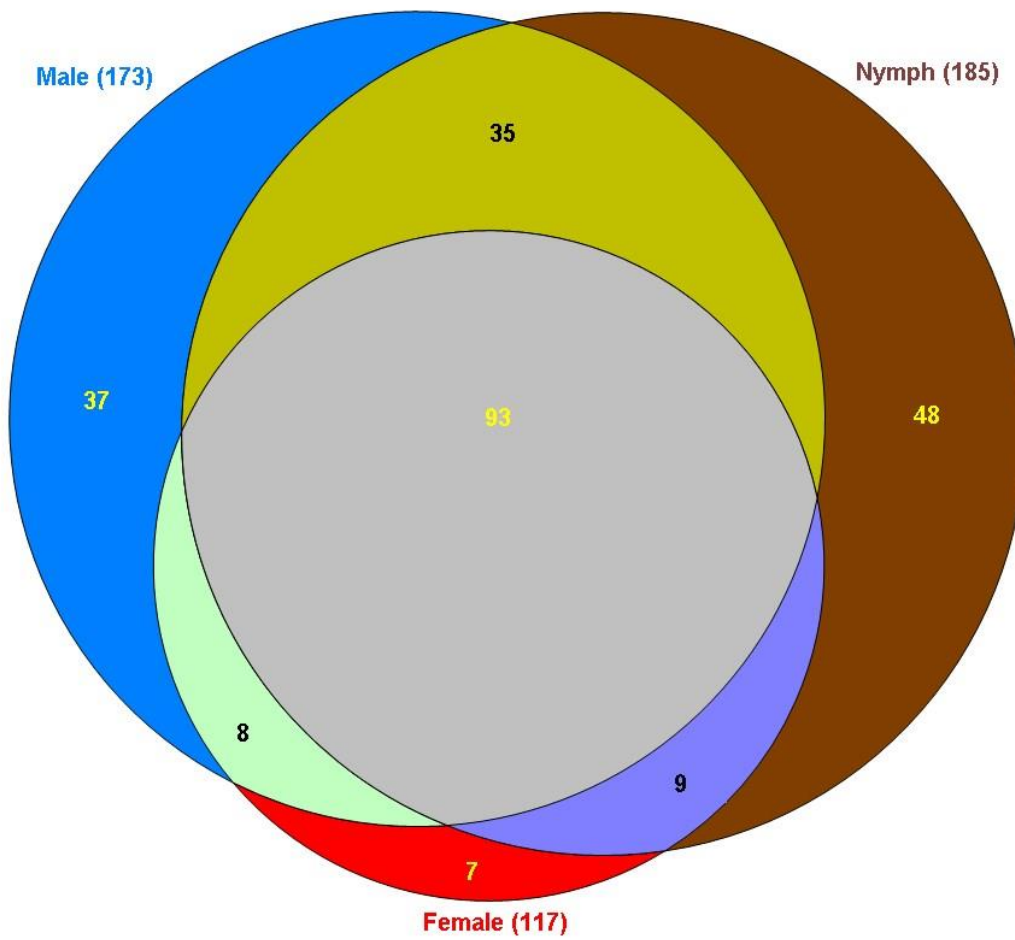

**Figure S3.** Distribution of genus-level taxa by stage and sex. The numbers of taxa in each compartment of the Venn diagram are shown.

**Table S1. The 10-base multiplex identifier MID used in this study.**

| Tick No | MID number | Sequence<br>(5'→3') | Stage/sex |
|---------|------------|---------------------|-----------|
| AaF-01  | MID-1      | ACGAGTGCGT          | Female    |
| AaF-02  | MID-2      | ACGCTCGACA          | Female    |
| AaF-03  | MID-3      | AGACGCACTC          | Female    |
| AaF-04  | MID-4      | AGCACTGTAG          | Female    |
| AaF-05  | MID-5      | ATCAGACACG          | Female    |
| AaF-06  | MID-6      | ATATCGCGAG          | Female    |
| AaM-20  | MID-7      | CGTGTCTCTA          | Male      |
| AaM-21  | MID-8      | CTCGCGTGTC          | Male      |
| AaM-22  | MID-10     | TCTCTATGCG          | Male      |
| AaM-23  | MID-11     | TGATACGTCT          | Male      |
| AaM-24  | MID-13     | CATAGTAGTG          | Male      |
| AaM-25  | MID-14     | CGAGAGATAC          | Male      |
| AaM-26  | MID-15     | ATACGACGTA          | Male      |
| AaN-45  | MID-16     | TCACGTAATA          | Nymph     |
| AaN-46  | MID-17     | CGTCTAGTAC          | Nymph     |
| AaN-47  | MID-18     | TCTACGTAGC          | Nymph     |
| AaN-48  | MID-19     | TGTACTACTC          | Nymph     |
| AaN-49  | MID-20     | ACGACTACAG          | Nymph     |
| AaN-50  | MID-21     | CGTAGACTAG          | Nymph     |
| AaN-51  | MID-22     | TACGAGTATG          | Nymph     |

**Table S2.** Procrustes results from different OTU picking methods using unweighted UniFrac at 500 and 1000 sequences per sample.

| Method         | Sequences per sample | Monte Carlo pvalue | M <sup>2</sup> |
|----------------|----------------------|--------------------|----------------|
| Denoised       | 1000                 | 0.000              | 0.26           |
| Denoised       | 500                  | 0.000              | 0.315          |
| Open reference | 1000                 | 0.000              | 0.027          |
| Open reference | 500                  | 0.000              | 0.020          |
| Usearch        | 1000                 | 0.006              | 0.108          |
| Usearch        | 500                  | 0.000              | 0.149          |

**Table S3.** Complete genus-level microbiome of 12 ticks

| Taxon                                                                                                      | AaF. 01 | AaF. 02 | AaF. 03 | AaF. 04 | AaF. 06 | AaM. 20 | AaM. 24 | AaM. 25 | AaM. 26 | AaN. 45 | AaN. 46 | AaN. 47 |
|------------------------------------------------------------------------------------------------------------|---------|---------|---------|---------|---------|---------|---------|---------|---------|---------|---------|---------|
| k__Bacteria;Other;Other;Other;Other;Other                                                                  | 0.003   | 0.003   | 0.026   | 0.002   | 0.008   | 0.004   | 0.008   | 0.023   | 0.005   | 0.003   | 0.009   | 0.001   |
| k__Bacteria;p__Acidobacteria;c__Acidobacteria-6;Other;Other;Other                                          | 0       | 0       | 0       | 0       | 0       | 0       | 0.001   | 0       | 0       | 0       | 0       | 0       |
| k__Bacteria;p__Acidobacteria;c__Acidobacteria-6;o__f__g__                                                  | 0       | 0       | 0       | 0       | 0       | 0       | 0       | 0       | 0.001   | 0       | 0       | 0       |
| k__Bacteria;p__Acidobacteria;c__Acidobacteria-6;o__iii1-15;f__g__                                          | 0       | 0       | 0       | 0       | 0       | 0       | 0       | 0       | 0       | 0.001   | 0.004   | 0       |
| k__Bacteria;p__Acidobacteria;c__Acidobacteriia;o__Acidobacteriales;f__Acidobacteriaceae;Other              | 0.004   | 0.001   | 0       | 0.006   | 0.043   | 0.008   | 0.006   | 0.123   | 0       | 0.008   | 0       | 0.022   |
| k__Bacteria;p__Acidobacteria;c__Acidobacteriia;o__Acidobacteriales;f__Acidobacteriaceae;g__                | 0       | 0.001   | 0       | 0.006   | 0.099   | 0.018   | 0.008   | 0.109   | 0       | 0.006   | 0       | 0.028   |
| k__Bacteria;p__Acidobacteria;c__Acidobacteriia;o__Acidobacteriales;f__Acidobacteriaceae;g__Edapho bacter   | 0       | 0       | 0       | 0       | 0.002   | 0.001   | 0       | 0.001   | 0       | 0       | 0       | 0       |
| k__Bacteria;p__Acidobacteria;c__Acidobacteriia;o__Acidobacteriales;f__Acidobacteriaceae;g__Terriglobus     | 0       | 0       | 0       | 0.005   | 0.006   | 0.004   | 0.002   | 0.03    | 0       | 0.004   | 0       | 0.008   |
| k__Bacteria;p__Acidobacteria;c__Solibacteres;o__Solibacterales;f__g__                                      | 0       | 0       | 0       | 0       | 0       | 0       | 0       | 0       | 0.001   | 0       | 0.013   | 0       |
| k__Bacteria;p__Acidobacteria;c__Solibacteres;o__Solibacterales;f__Solibacteraceae;g__                      | 0       | 0       | 0       | 0       | 0       | 0       | 0.004   | 0.003   | 0       | 0.002   | 0       | 0       |
| k__Bacteria;p__Acidobacteria;c__Solibacteres;o__Solibacterales;f__Solibacteraceae;g__Candidatus Solibacter | 0       | 0       | 0       | 0       | 0       | 0       | 0.001   | 0       | 0       | 0       | 0.001   | 0.003   |
| k__Bacteria;p__Acidobacteria;c__Sva0725;o__Sva0725;f__g__                                                  | 0       | 0       | 0       | 0       | 0       | 0       | 0       | 0       | 0       | 0.002   | 0.001   | 0       |
| k__Bacteria;p__Acidobacteria;c__[Chloracidobacteriia];o__RB41;Other;Other                                  | 0       | 0.001   | 0       | 0       | 0       | 0       | 0.001   | 0       | 0       | 0.002   | 0       | 0       |
| k__Bacteria;p__Acidobacteria;c__[Chloracidobacteriia];o__RB41;f__Ellin6075;g__                             | 0       | 0       | 0.011   | 0       | 0       | 0       | 0.013   | 0.001   | 0.008   | 0.005   | 0.018   | 0       |

|                                                                                                               |       |       |       |       |       |       |       |       |       |       |       |       |       |
|---------------------------------------------------------------------------------------------------------------|-------|-------|-------|-------|-------|-------|-------|-------|-------|-------|-------|-------|-------|
| k__Bacteria;p__Actinobacteria;Other;Other;Other;Other                                                         | 0     | 0     | 0     | 0     | 0     | 0     | 0     | 0.001 | 0     | 0     | 0     | 0     | 0     |
| k__Bacteria;p__Actinobacteria;c__Acidimicrobiia;o__Acidimicrobiales;Other;Other                               | 0     | 0     | 0     | 0     | 0     | 0     | 0     | 0     | 0     | 0     | 0     | 0.003 | 0     |
| k__Bacteria;p__Actinobacteria;c__Acidimicrobiia;o__Acidimicrobiales;f__g__                                    | 0     | 0.001 | 0     | 0     | 0     | 0     | 0     | 0.001 | 0.001 | 0     | 0.001 | 0.009 | 0     |
| k__Bacteria;p__Actinobacteria;c__Acidimicrobiia;o__Acidimicrobiales;f__C111;g__                               | 0     | 0     | 0     | 0     | 0     | 0     | 0     | 0     | 0.001 | 0     | 0     | 0.004 | 0     |
| k__Bacteria;p__Actinobacteria;c__Acidimicrobiia;o__Acidimicrobiales;f__EB1017;g__                             | 0     | 0.001 | 0     | 0     | 0     | 0     | 0     | 0     | 0     | 0     | 0     | 0.005 | 0     |
| k__Bacteria;p__Actinobacteria;c__Actinobacteria;Other;Other;Other                                             | 0     | 0     | 0     | 0     | 0     | 0     | 0     | 0     | 0.001 | 0     | 0.003 | 0     | 0     |
| k__Bacteria;p__Actinobacteria;c__Actinobacteria;o__Actinomycetales;Other;Other                                | 0.007 | 0.007 | 0.012 | 0.003 | 0.007 | 0.002 | 0.023 | 0.012 | 0.006 | 0.02  | 0.019 | 0.009 | 0.009 |
| k__Bacteria;p__Actinobacteria;c__Actinobacteria;o__Actinomycetales;f__g__                                     | 0     | 0     | 0     | 0     | 0     | 0     | 0     | 0     | 0     | 0     | 0     | 0.005 | 0     |
| k__Bacteria;p__Actinobacteria;c__Actinobacteria;o__Actinomycetales;f__Corynebacteriaceae;g__Corynebacterium   | 0     | 0     | 0     | 0.001 | 0     | 0     | 0.002 | 0     | 0     | 0     | 0     | 0     | 0     |
| k__Bacteria;p__Actinobacteria;c__Actinobacteria;o__Actinomycetales;f__Cryptosporangiaceae;g__Cryptosporangium | 0     | 0     | 0     | 0     | 0     | 0     | 0.001 | 0     | 0     | 0     | 0     | 0     | 0     |
| k__Bacteria;p__Actinobacteria;c__Actinobacteria;o__Actinomycetales;f__Frankiaceae;g__                         | 0     | 0.002 | 0     | 0     | 0     | 0.001 | 0.007 | 0.006 | 0     | 0.001 | 0.001 | 0.003 | 0.003 |
| k__Bacteria;p__Actinobacteria;c__Actinobacteria;o__Actinomycetales;f__Intrasporangiaceae;Other                | 0     | 0     | 0.011 | 0     | 0     | 0     | 0     | 0     | 0.001 | 0     | 0.01  | 0     | 0     |
| k__Bacteria;p__Actinobacteria;c__Actinobacteria;o__Actinomycetales;f__Intrasporangiaceae;g__Phycococcus       | 0     | 0     | 0.001 | 0     | 0     | 0     | 0     | 0     | 0     | 0     | 0     | 0.024 | 0     |
| k__Bacteria;p__Actinobacteria;c__Actinobacteria;o__Actinomycetales;f__Intrasporangiaceae;g__Terracoccus       | 0     | 0     | 0     | 0     | 0     | 0     | 0     | 0     | 0     | 0     | 0     | 0.001 | 0     |

|                                                                                                           |       |       |       |       |       |       |       |       |       |       |       |       |
|-----------------------------------------------------------------------------------------------------------|-------|-------|-------|-------|-------|-------|-------|-------|-------|-------|-------|-------|
| k__Bacteria;p__Actinobacteria;c__Actinobacteria;o__Actinomycetales;f__Kineosporiaceae;g__                 | 0     | 0.001 | 0.001 | 0     | 0     | 0     | 0.001 | 0     | 0.001 | 0.001 | 0     | 0.001 |
| k__Bacteria;p__Actinobacteria;c__Actinobacteria;o__Actinomycetales;f__Microbacteriaceae;Other             | 0.003 | 0.002 | 0.001 | 0.005 | 0.002 | 0.002 | 0.003 | 0.01  | 0.011 | 0.007 | 0     | 0.009 |
| k__Bacteria;p__Actinobacteria;c__Actinobacteria;o__Actinomycetales;f__Microbacteriaceae;g__               | 0.003 | 0.002 | 0     | 0.001 | 0.006 | 0.003 | 0.011 | 0.02  | 0.005 | 0.017 | 0     | 0.005 |
| k__Bacteria;p__Actinobacteria;c__Actinobacteria;o__Actinomycetales;f__Microbacteriaceae;g__Agrococcus     | 0     | 0     | 0.001 | 0     | 0     | 0     | 0     | 0     | 0     | 0     | 0     | 0     |
| k__Bacteria;p__Actinobacteria;c__Actinobacteria;o__Actinomycetales;f__Microbacteriaceae;g__Curtobacterium | 0     | 0     | 0.001 | 0.001 | 0     | 0     | 0     | 0     | 0     | 0     | 0     | 0     |
| k__Bacteria;p__Actinobacteria;c__Actinobacteria;o__Actinomycetales;f__Microbacteriaceae;g__Microbacterium | 0     | 0     | 0.001 | 0     | 0     | 0     | 0     | 0     | 0.002 | 0     | 0     | 0     |
| k__Bacteria;p__Actinobacteria;c__Actinobacteria;o__Actinomycetales;f__Microbacteriaceae;g__Rathayibacter  | 0     | 0     | 0.001 | 0     | 0     | 0     | 0     | 0     | 0     | 0     | 0     | 0     |
| k__Bacteria;p__Actinobacteria;c__Actinobacteria;o__Actinomycetales;f__Micromonosporaceae;Other            | 0.001 | 0     | 0     | 0     | 0.001 | 0     | 0.003 | 0     | 0     | 0     | 0     | 0     |
| k__Bacteria;p__Actinobacteria;c__Actinobacteria;o__Actinomycetales;f__Micromonosporaceae;g__              | 0     | 0     | 0     | 0     | 0     | 0     | 0.004 | 0     | 0.001 | 0     | 0     | 0.001 |
| k__Bacteria;p__Actinobacteria;c__Actinobacteria;o__Actinomycetales;f__Micromonosporaceae;g__Actinoplanes  | 0     | 0     | 0     | 0     | 0     | 0     | 0.001 | 0     | 0     | 0     | 0     | 0     |
| k__Bacteria;p__Actinobacteria;c__Actinobacteria;o__Actinomycetales;f__Mycobacteriaceae;g__Mycobacterium   | 0.002 | 0.006 | 0.001 | 0.001 | 0.001 | 0.002 | 0.023 | 0.005 | 0.009 | 0.008 | 0.015 | 0.003 |
| k__Bacteria;p__Actinobacteria;c__Actinobacteria;o__Actinomycetales;f__Nakamurellaceae;g__                 | 0     | 0     | 0     | 0     | 0     | 0     | 0.002 | 0     | 0     | 0     | 0     | 0     |
| k__Bacteria;p__Actinobacteria;c__Actinobacteria;o__Actinomycetales;f__Nocardiaceae;g__Nocardia            | 0     | 0     | 0     | 0     | 0     | 0     | 0     | 0     | 0.001 | 0     | 0     | 0     |
| k__Bacteria;p__Actinobacteria;c__Actinobacteria;o__Actinomycetales;f__Nocardiaceae;g__Rhodococcus         | 0     | 0     | 0     | 0     | 0     | 0     | 0     | 0     | 0     | 0     | 0.001 | 0     |



|                                                                                                                 |       |       |       |       |       |       |       |       |       |       |       |       |
|-----------------------------------------------------------------------------------------------------------------|-------|-------|-------|-------|-------|-------|-------|-------|-------|-------|-------|-------|
| us                                                                                                              |       |       |       |       |       |       |       |       |       |       |       |       |
| k__Bacteria;p__Actinobacteria;c__Actinobacteria;o__Actinomycetales;f__Nocardioideaceae;Other                    | 0     | 0.001 | 0.003 | 0     | 0     | 0     | 0.002 | 0.001 | 0.004 | 0.001 | 0.022 | 0     |
| k__Bacteria;p__Actinobacteria;c__Actinobacteria;o__Actinomycetales;f__Nocardioideaceae;g__                      | 0     | 0.004 | 0.008 | 0     | 0     | 0.001 | 0.013 | 0.002 | 0.012 | 0.004 | 0.056 | 0.001 |
| k__Bacteria;p__Actinobacteria;c__Actinobacteria;o__Actinomycetales;f__Nocardioideaceae;g__Friedmanniella        | 0     | 0     | 0.002 | 0     | 0     | 0     | 0.003 | 0     | 0     | 0.001 | 0.002 | 0     |
| k__Bacteria;p__Actinobacteria;c__Actinobacteria;o__Actinomycetales;f__Nocardioideaceae;g__Kribbella             | 0     | 0     | 0     | 0     | 0     | 0     | 0     | 0     | 0     | 0     | 0.002 | 0     |
| k__Bacteria;p__Actinobacteria;c__Actinobacteria;o__Actinomycetales;f__Nocardioideaceae;g__Nocardioides          | 0     | 0     | 0.001 | 0     | 0     | 0     | 0.001 | 0     | 0.002 | 0     | 0.011 | 0     |
| k__Bacteria;p__Actinobacteria;c__Actinobacteria;o__Actinomycetales;f__Propionibacteriaceae;g__Microlunatus      | 0     | 0     | 0.001 | 0     | 0     | 0     | 0     | 0     | 0     | 0.001 | 0     | 0     |
| k__Bacteria;p__Actinobacteria;c__Actinobacteria;o__Actinomycetales;f__Propionibacteriaceae;g__Propionibacterium | 0     | 0.003 | 0     | 0.002 | 0.002 | 0     | 0.007 | 0     | 0     | 0     | 0     | 0.003 |
| k__Bacteria;p__Actinobacteria;c__Actinobacteria;o__Actinomycetales;f__Pseudonocardiaceae;Other                  | 0     | 0.001 | 0.002 | 0     | 0     | 0     | 0.001 | 0     | 0     | 0     | 0     | 0.001 |
| k__Bacteria;p__Actinobacteria;c__Actinobacteria;o__Actinomycetales;f__Pseudonocardiaceae;g__Actinomycetospira   | 0.001 | 0.001 | 0.003 | 0.002 | 0     | 0     | 0.002 | 0     | 0     | 0.002 | 0.003 | 0.009 |
| k__Bacteria;p__Actinobacteria;c__Actinobacteria;o__Actinomycetales;f__Pseudonocardiaceae;g__Pseudonocardia      | 0.001 | 0.003 | 0.011 | 0.001 | 0.005 | 0.001 | 0.011 | 0     | 0.001 | 0.005 | 0.005 | 0.013 |
| k__Bacteria;p__Actinobacteria;c__Actinobacteria;o__Actinomycetales;f__Sporichthyaceae;g__                       | 0     | 0     | 0     | 0     | 0     | 0     | 0.007 | 0     | 0     | 0     | 0     | 0     |
| k__Bacteria;p__Actinobacteria;c__Actinobacteria;o__Actinomycetales;f__Streptomycetaceae;g__                     | 0     | 0     | 0     | 0     | 0     | 0     | 0     | 0     | 0     | 0.001 | 0.002 | 0     |

|                                                                                                              |       |   |       |   |       |   |       |       |       |       |       |       |       |
|--------------------------------------------------------------------------------------------------------------|-------|---|-------|---|-------|---|-------|-------|-------|-------|-------|-------|-------|
| k__Bacteria;p__Actinobacteria;c__Actinobacteria;o__Actinomycetales;f__Williamsiaceae;g__Williamsia           | 0     | 0 | 0     | 0 | 0     | 0 | 0     | 0     | 0     | 0.001 | 0     | 0     | 0     |
| k__Bacteria;p__Actinobacteria;c__Thermoleophilia;o__Gaiellales;f__;g__                                       | 0.001 | 0 | 0     | 0 | 0     | 0 | 0     | 0     | 0     | 0     | 0     | 0     | 0     |
| k__Bacteria;p__Actinobacteria;c__Thermoleophilia;o__Gaiellales;f__AK1AB1_02E;g__                             | 0     | 0 | 0     | 0 | 0     | 0 | 0     | 0     | 0.002 | 0.001 | 0     | 0     | 0     |
| k__Bacteria;p__Actinobacteria;c__Thermoleophilia;o__Solirubrobacterales;Other;Other                          | 0     | 0 | 0     | 0 | 0.001 | 0 | 0     | 0.001 | 0     | 0     | 0.003 | 0.001 | 0     |
| k__Bacteria;p__Actinobacteria;c__Thermoleophilia;o__Solirubrobacterales;f__;g__                              | 0     | 0 | 0     | 0 | 0     | 0 | 0.001 | 0     | 0.001 | 0.001 | 0.001 | 0.001 | 0     |
| k__Bacteria;p__Actinobacteria;c__Thermoleophilia;o__Solirubrobacterales;f__Patulibacteraceae;g__             | 0     | 0 | 0     | 0 | 0     | 0 | 0.002 | 0     | 0     | 0     | 0.001 | 0.001 | 0     |
| k__Bacteria;p__Actinobacteria;c__Thermoleophilia;o__Solirubrobacterales;f__Patulibacteraceae;g__Patulibacter | 0     | 0 | 0     | 0 | 0.004 | 0 | 0.002 | 0     | 0     | 0     | 0     | 0     | 0.004 |
| k__Bacteria;p__Actinobacteria;c__Thermoleophilia;o__Solirubrobacterales;f__Solirubrobacteraceae;Other        | 0     | 0 | 0     | 0 | 0     | 0 | 0.002 | 0     | 0     | 0     | 0     | 0     | 0     |
| k__Bacteria;p__Actinobacteria;c__Thermoleophilia;o__Solirubrobacterales;f__Solirubrobacteraceae;g__          | 0     | 0 | 0     | 0 | 0     | 0 | 0     | 0     | 0     | 0     | 0.002 | 0.002 | 0     |
| k__Bacteria;p__Armatimonadetes;c__0319-6E2;o__;f__;g__                                                       | 0     | 0 | 0     | 0 | 0     | 0 | 0     | 0     | 0     | 0     | 0     | 0.002 | 0     |
| k__Bacteria;p__Armatimonadetes;c__Armatimonadia;o__Armatimonadales;f__Armatimonadaceae;g__                   | 0     | 0 | 0.002 | 0 | 0     | 0 | 0.002 | 0     | 0.001 | 0.001 | 0.001 | 0.001 | 0     |
| k__Bacteria;p__Armatimonadetes;c__Armatimonadia;o__FW68;f__;g__                                              | 0     | 0 | 0     | 0 | 0     | 0 | 0.001 | 0     | 0     | 0     | 0     | 0     | 0     |
| k__Bacteria;p__Armatimonadetes;c__Chthonomonadetes;o__Chthonomonadales;f__Chthonomonadaceae;g__              | 0     | 0 | 0     | 0 | 0     | 0 | 0.001 | 0     | 0     | 0     | 0     | 0     | 0     |
| k__Bacteria;p__Armatimonadetes;c__[Fimbriimonadia];o__[Fimbriimonadales];f__[Fimbriimonadaceae];Other        | 0     | 0 | 0     | 0 | 0     | 0 | 0.001 | 0     | 0     | 0     | 0.001 | 0.001 | 0     |

|                                                                                                                 |       |       |       |       |       |       |       |       |       |       |       |       |
|-----------------------------------------------------------------------------------------------------------------|-------|-------|-------|-------|-------|-------|-------|-------|-------|-------|-------|-------|
| k__Bacteria;p__Armatimonadetes;c__[Fimbriimonadia];o__[Fimbriimonadales];f__[Fimbriimonadaceae];g__Fimbriimonas | 0     | 0     | 0     | 0     | 0     | 0     | 0     | 0     | 0     | 0.001 | 0     | 0.001 |
| k__Bacteria;p__Bacteroidetes;c__Cytophagia;o__Cytophagales;Other;Other                                          | 0     | 0     | 0     | 0     | 0     | 0     | 0     | 0     | 0.001 | 0     | 0.001 | 0     |
| k__Bacteria;p__Bacteroidetes;c__Cytophagia;o__Cytophagales;f__Cytophagaceae;g__Dyadobacter                      | 0     | 0     | 0.002 | 0.001 | 0     | 0     | 0     | 0     | 0.005 | 0     | 0     | 0     |
| k__Bacteria;p__Bacteroidetes;c__Cytophagia;o__Cytophagales;f__Cytophagaceae;g__Hymenobacter                     | 0.002 | 0     | 0.006 | 0.008 | 0     | 0.001 | 0.001 | 0     | 0.008 | 0     | 0.001 | 0     |
| k__Bacteria;p__Bacteroidetes;c__Cytophagia;o__Cytophagales;f__Cytophagaceae;g__Larkinella                       | 0     | 0     | 0     | 0     | 0     | 0     | 0     | 0     | 0     | 0     | 0.001 | 0     |
| k__Bacteria;p__Bacteroidetes;c__Cytophagia;o__Cytophagales;f__Cytophagaceae;g__Spirosoma                        | 0     | 0.002 | 0.003 | 0.013 | 0     | 0     | 0.013 | 0.001 | 0.007 | 0.004 | 0.004 | 0     |
| k__Bacteria;p__Bacteroidetes;c__Flavobacteriia;o__Flavobacteriales;f__Flavobacteriaceae;g__Flavobacterium       | 0     | 0     | 0     | 0     | 0     | 0     | 0.001 | 0     | 0.001 | 0     | 0     | 0     |
| k__Bacteria;p__Bacteroidetes;c__Sphingobacteriia;o__Sphingobacteriales;f__Sphingobacteriaceae;Other             | 0     | 0     | 0     | 0     | 0     | 0     | 0     | 0     | 0.001 | 0     | 0     | 0     |
| k__Bacteria;p__Bacteroidetes;c__Sphingobacteriia;o__Sphingobacteriales;f__Sphingobacteriaceae;g__               | 0.001 | 0     | 0     | 0     | 0.001 | 0.001 | 0.002 | 0.014 | 0.005 | 0.012 | 0     | 0.005 |
| k__Bacteria;p__Bacteroidetes;c__Sphingobacteriia;o__Sphingobacteriales;f__Sphingobacteriaceae;g__Pedobacter     | 0     | 0     | 0     | 0.002 | 0     | 0     | 0     | 0     | 0.002 | 0     | 0     | 0     |
| k__Bacteria;p__Bacteroidetes;c__[Rhodothermi];o__[Rhodothermales];f__Rhodothermaceae;g__Rubricoccus             | 0     | 0     | 0     | 0     | 0     | 0     | 0     | 0     | 0.001 | 0     | 0.001 | 0     |
| k__Bacteria;p__Bacteroidetes;c__[Saprospirae];Other;Other;Other                                                 | 0     | 0     | 0     | 0     | 0     | 0     | 0.002 | 0     | 0     | 0     | 0     | 0     |
| k__Bacteria;p__Bacteroidetes;c__[Saprospirae];o__[Saprospirales];f__Chitinophagaceae;Other                      | 0.001 | 0.001 | 0.002 | 0     | 0     | 0.001 | 0.01  | 0.023 | 0     | 0.01  | 0.005 | 0     |
| k__Bacteria;p__Bacteroidetes;c__[Saprospirae];o__[Saprospirales];f__Chitinophagaceae;g__                        | 0.005 | 0.001 | 0.004 | 0     | 0     | 0.001 | 0.017 | 0.002 | 0.016 | 0.005 | 0.008 | 0.003 |

|                                                                                                                        |   |   |       |       |   |       |       |       |       |       |       |       |
|------------------------------------------------------------------------------------------------------------------------|---|---|-------|-------|---|-------|-------|-------|-------|-------|-------|-------|
| k__Bacteria;p__Bacteroidetes;c__[Saprospirae];o__[Saprospirales];f__Chitinophagaceae;g__Flavisoliba<br>cter            | 0 | 0 | 0     | 0     | 0 | 0     | 0.001 | 0     | 0     | 0     | 0.005 | 0     |
| k__Bacteria;p__Bacteroidetes;c__[Saprospirae];o__[Saprospirales];f__Chitinophagaceae;g__Segetibact<br>er               | 0 | 0 | 0     | 0     | 0 | 0     | 0     | 0     | 0     | 0     | 0.006 | 0     |
| k__Bacteria;p__Chloroflexi;c__Anaerolineae;o__SB<br>R1031;f__A4b;g__                                                   | 0 | 0 | 0     | 0     | 0 | 0.001 | 0     | 0     | 0     | 0.001 | 0.002 | 0     |
| k__Bacteria;p__Chloroflexi;c__Anaerolineae;o__W<br>CHB1-50;f__g__                                                      | 0 | 0 | 0     | 0     | 0 | 0     | 0     | 0     | 0     | 0     | 0.001 | 0     |
| k__Bacteria;p__Chloroflexi;c__Chloroflexi;o__AKIW<br>781;f__g__                                                        | 0 | 0 | 0.001 | 0     | 0 | 0     | 0.001 | 0     | 0     | 0     | 0.001 | 0     |
| k__Bacteria;p__Chloroflexi;c__Chloroflexi;o__Chlor<br>oflexales;Other;Other                                            | 0 | 0 | 0     | 0     | 0 | 0     | 0.001 | 0     | 0     | 0     | 0.001 | 0     |
| k__Bacteria;p__Chloroflexi;c__Chloroflexi;o__[Rose<br>iflexales];f__[Kouleothrixaceae];Other                           | 0 | 0 | 0     | 0     | 0 | 0     | 0     | 0     | 0     | 0     | 0.002 | 0     |
| k__Bacteria;p__Chloroflexi;c__Chloroflexi;o__[Rose<br>iflexales];f__[Kouleothrixaceae];g__                             | 0 | 0 | 0     | 0     | 0 | 0     | 0     | 0     | 0     | 0     | 0.002 | 0     |
| k__Bacteria;p__Chloroflexi;c__Chloroflexi;o__[Rose<br>iflexales];f__[Kouleothrixaceae];g__Kouleothrix                  | 0 | 0 | 0     | 0     | 0 | 0     | 0     | 0     | 0     | 0     | 0.001 | 0     |
| k__Bacteria;p__Chloroflexi;c__Thermomicrobia;o__<br>;f__g__                                                            | 0 | 0 | 0     | 0     | 0 | 0     | 0.001 | 0     | 0     | 0     | 0     | 0     |
| k__Bacteria;p__Cyanobacteria;c__4C0d-<br>2;o__MLE1-12;f__g__                                                           | 0 | 0 | 0     | 0     | 0 | 0     | 0     | 0     | 0.001 | 0     | 0     | 0.003 |
| k__Bacteria;p__Cyanobacteria;c__Chloroplast;o__S<br>tramenopiles;f__g__                                                | 0 | 0 | 0     | 0     | 0 | 0     | 0     | 0.001 | 0     | 0     | 0.003 | 0     |
| k__Bacteria;p__Cyanobacteria;c__Synechococcoph<br>ycideae;o__Pseudanabaenales;f__Pseudanabaenac<br>eae;g__Leptolyngbya | 0 | 0 | 0     | 0     | 0 | 0     | 0     | 0.001 | 0     | 0     | 0     | 0     |
| k__Bacteria;p__FBP;c__o__f__g__                                                                                        | 0 | 0 | 0.003 | 0.001 | 0 | 0     | 0     | 0     | 0     | 0.002 | 0     | 0     |
| k__Bacteria;p__Firmicutes;c__Bacilli;Other;Other;O<br>ther                                                             | 0 | 0 | 0     | 0     | 0 | 0     | 0.004 | 0     | 0     | 0     | 0     | 0     |
| k__Bacteria;p__Firmicutes;c__Bacilli;o__Bacillales;f__<br>Bacillaceae;g__                                              | 0 | 0 | 0     | 0.002 | 0 | 0     | 0.001 | 0     | 0     | 0     | 0     | 0     |

|                                                                                                |   |   |       |   |       |       |       |       |       |       |       |       |
|------------------------------------------------------------------------------------------------|---|---|-------|---|-------|-------|-------|-------|-------|-------|-------|-------|
| k__Bacteria;p__Firmicutes;c__Bacilli;o__Bacillales;f__Paenibacillaceae;g__Paenibacillus        | 0 | 0 | 0     | 0 | 0     | 0     | 0     | 0     | 0     | 0.001 | 0     | 0     |
| k__Bacteria;p__Firmicutes;c__Bacilli;o__Bacillales;f__Staphylococcaceae;g__Staphylococcus      | 0 | 0 | 0     | 0 | 0     | 0     | 0.001 | 0     | 0     | 0     | 0     | 0.001 |
| k__Bacteria;p__Firmicutes;c__Bacilli;o__Gemellales;f__;g__                                     | 0 | 0 | 0     | 0 | 0     | 0     | 0     | 0     | 0.001 | 0     | 0     | 0     |
| k__Bacteria;p__Firmicutes;c__Bacilli;o__Lactobacillales;f__Streptococcaceae;g__Streptococcus   | 0 | 0 | 0     | 0 | 0     | 0     | 0     | 0     | 0     | 0     | 0     | 0.001 |
| k__Bacteria;p__Firmicutes;c__Clostridia;o__Clostridiales;f__;g__                               | 0 | 0 | 0     | 0 | 0     | 0     | 0     | 0     | 0     | 0     | 0.002 | 0     |
| k__Bacteria;p__Firmicutes;c__Clostridia;o__Clostridiales;f__[Tissierellaceae];g__Finegoldia    | 0 | 0 | 0     | 0 | 0     | 0     | 0     | 0     | 0     | 0     | 0.001 | 0     |
| k__Bacteria;p__Firmicutes;c__Clostridia;o__Clostridiales;f__[Tissierellaceae];g__Peptoniphilus | 0 | 0 | 0     | 0 | 0     | 0     | 0.001 | 0     | 0     | 0     | 0     | 0     |
| k__Bacteria;p__Gemmatimonadetes;c__Gemmatimonadetes;Other;Other;Other                          | 0 | 0 | 0     | 0 | 0     | 0     | 0     | 0     | 0.001 | 0     | 0     | 0     |
| k__Bacteria;p__Gemmatimonadetes;c__Gemmatimonadetes;o__Gemmatimonadales;Other;Other            | 0 | 0 | 0     | 0 | 0     | 0     | 0     | 0     | 0     | 0     | 0.002 | 0     |
| k__Bacteria;p__Gemmatimonadetes;c__Gemmatimonadetes;o__Gemmatimonadales;f__;g__                | 0 | 0 | 0.002 | 0 | 0     | 0     | 0     | 0     | 0     | 0.001 | 0.004 | 0     |
| k__Bacteria;p__Gemmatimonadetes;c__Gemmatimonadetes;o__N1423WL;f__;g__                         | 0 | 0 | 0     | 0 | 0     | 0     | 0     | 0     | 0     | 0     | 0.002 | 0     |
| k__Bacteria;p__Planctomycetes;c__Phycisphaerae;o__WD2101;f__;g__                               | 0 | 0 | 0.003 | 0 | 0     | 0     | 0.01  | 0.001 | 0.003 | 0.003 | 0.007 | 0.009 |
| k__Bacteria;p__Planctomycetes;c__Planctomycetia;o__Gemmatales;f__Gemmataceae;Other             | 0 | 0 | 0     | 0 | 0     | 0     | 0     | 0     | 0     | 0.001 | 0     | 0     |
| k__Bacteria;p__Planctomycetes;c__Planctomycetia;o__Gemmatales;f__Gemmataceae;g__               | 0 | 0 | 0     | 0 | 0     | 0     | 0     | 0     | 0     | 0.001 | 0.001 | 0.001 |
| k__Bacteria;p__Planctomycetes;c__Planctomycetia;o__Gemmatales;f__Gemmataceae;g__Gemmata        | 0 | 0 | 0     | 0 | 0.002 | 0.002 | 0.004 | 0     | 0     | 0.001 | 0.003 | 0.003 |

|                                                                                                                  |       |       |       |       |       |       |       |       |       |       |       |       |
|------------------------------------------------------------------------------------------------------------------|-------|-------|-------|-------|-------|-------|-------|-------|-------|-------|-------|-------|
| k__Bacteria;p__Planctomycetes;c__Planctomycetia;o__Gemmatales;f__Isosphaeraceae;Other                            | 0     | 0     | 0     | 0     | 0.001 | 0     | 0     | 0.003 | 0     | 0.002 | 0     | 0.001 |
| k__Bacteria;p__Planctomycetes;c__Planctomycetia;o__Gemmatales;f__Isosphaeraceae;g__                              | 0.002 | 0     | 0.002 | 0.004 | 0.011 | 0.001 | 0.013 | 0.011 | 0.002 | 0.008 | 0.013 | 0.025 |
| k__Bacteria;p__Planctomycetes;c__Planctomycetia;o__Pirellulales;f__Pirellulaceae;Other                           | 0     | 0     | 0     | 0     | 0     | 0     | 0     | 0     | 0     | 0.005 | 0     | 0     |
| k__Bacteria;p__Planctomycetes;c__Planctomycetia;o__Pirellulales;f__Pirellulaceae;g__A17                          | 0     | 0     | 0     | 0     | 0     | 0     | 0     | 0     | 0     | 0     | 0.001 | 0     |
| k__Bacteria;p__Planctomycetes;c__Planctomycetia;o__Planctomycetales;f__Planctomycetaceae;g__Planctomyces         | 0     | 0     | 0     | 0     | 0     | 0     | 0     | 0     | 0     | 0.001 | 0     | 0     |
| k__Bacteria;p__Planctomycetes;c__vadinHA49;o__p04_C01;f__g__                                                     | 0     | 0     | 0     | 0     | 0     | 0     | 0     | 0     | 0     | 0.004 | 0     | 0     |
| k__Bacteria;p__Proteobacteria;Other;Other;Other;Other                                                            | 0.006 | 0.043 | 0.027 | 0.015 | 0.001 | 0.001 | 0.009 | 0.011 | 0.012 | 0.006 | 0.006 | 0.003 |
| k__Bacteria;p__Proteobacteria;c__Alphaproteobacteria;Other;Other;Other                                           | 0.004 | 0.025 | 0.038 | 0.013 | 0.052 | 0.025 | 0.024 | 0.015 | 0.012 | 0.029 | 0.008 | 0.023 |
| k__Bacteria;p__Proteobacteria;c__Alphaproteobacteria;o__f__g__                                                   | 0     | 0     | 0.001 | 0     | 0     | 0     | 0.003 | 0     | 0.001 | 0.003 | 0.002 | 0.003 |
| k__Bacteria;p__Proteobacteria;c__Alphaproteobacteria;o__Caulobacteriales;f__Caulobacteraceae;Other               | 0.001 | 0     | 0.001 | 0.003 | 0     | 0     | 0.007 | 0.007 | 0.013 | 0.002 | 0.009 | 0.002 |
| k__Bacteria;p__Proteobacteria;c__Alphaproteobacteria;o__Caulobacteriales;f__Caulobacteraceae;g__                 | 0.002 | 0     | 0.001 | 0.002 | 0.006 | 0.001 | 0.01  | 0.004 | 0     | 0     | 0.008 | 0.002 |
| k__Bacteria;p__Proteobacteria;c__Alphaproteobacteria;o__Caulobacteriales;f__Caulobacteraceae;g__Caulobacter      | 0.001 | 0.001 | 0     | 0     | 0.001 | 0     | 0     | 0     | 0.002 | 0     | 0     | 0.002 |
| k__Bacteria;p__Proteobacteria;c__Alphaproteobacteria;o__Caulobacteriales;f__Caulobacteraceae;g__Mycoplana        | 0     | 0.006 | 0.004 | 0     | 0     | 0     | 0     | 0     | 0.004 | 0.001 | 0.018 | 0     |
| k__Bacteria;p__Proteobacteria;c__Alphaproteobacteria;o__Caulobacteriales;f__Caulobacteraceae;g__Phenylobacterium | 0.002 | 0.001 | 0     | 0     | 0     | 0.001 | 0.002 | 0.003 | 0.001 | 0.004 | 0.007 | 0.005 |
| k__Bacteria;p__Proteobacteria;c__Alphaproteobacteria;o__Ellin329;f__g__                                          | 0.001 | 0     | 0     | 0     | 0     | 0.001 | 0.002 | 0.003 | 0     | 0.004 | 0     | 0.021 |

|                                                                                                            |       |       |       |       |       |       |       |       |       |       |       |       |
|------------------------------------------------------------------------------------------------------------|-------|-------|-------|-------|-------|-------|-------|-------|-------|-------|-------|-------|
| k__Bacteria;p__Proteobacteria;c__Alphaproteobacteria;o__Rhizobiales;Other;Other                            | 0.014 | 0.016 | 0.013 | 0.013 | 0.021 | 0.012 | 0.072 | 0.063 | 0.018 | 0.041 | 0.048 | 0.033 |
| k__Bacteria;p__Proteobacteria;c__Alphaproteobacteria;o__Rhizobiales;f__g__                                 | 0     | 0.001 | 0     | 0     | 0     | 0     | 0     | 0     | 0     | 0     | 0.002 | 0.001 |
| k__Bacteria;p__Proteobacteria;c__Alphaproteobacteria;o__Rhizobiales;f__Aurantimonadaceae;Other             | 0     | 0     | 0     | 0.001 | 0     | 0     | 0     | 0     | 0     | 0     | 0     | 0     |
| k__Bacteria;p__Proteobacteria;c__Alphaproteobacteria;o__Rhizobiales;f__Aurantimonadaceae;g__               | 0     | 0     | 0     | 0     | 0     | 0     | 0     | 0     | 0.001 | 0     | 0.001 | 0     |
| k__Bacteria;p__Proteobacteria;c__Alphaproteobacteria;o__Rhizobiales;f__Beijerinckiaceae;Other              | 0     | 0     | 0.003 | 0.001 | 0.015 | 0.003 | 0.001 | 0.005 | 0.001 | 0.005 | 0.007 | 0.002 |
| k__Bacteria;p__Proteobacteria;c__Alphaproteobacteria;o__Rhizobiales;f__Beijerinckiaceae;g__                | 0.001 | 0.001 | 0.002 | 0     | 0     | 0     | 0.007 | 0     | 0     | 0.003 | 0.003 | 0     |
| k__Bacteria;p__Proteobacteria;c__Alphaproteobacteria;o__Rhizobiales;f__Beijerinckiaceae;g__Beijerinckia    | 0.001 | 0     | 0     | 0.001 | 0.009 | 0.008 | 0.009 | 0.015 | 0     | 0.012 | 0     | 0.009 |
| k__Bacteria;p__Proteobacteria;c__Alphaproteobacteria;o__Rhizobiales;f__Bradyrhizobiaceae;Other             | 0.005 | 0.005 | 0.004 | 0.001 | 0.005 | 0.008 | 0.014 | 0.061 | 0.007 | 0.007 | 0.01  | 0.016 |
| k__Bacteria;p__Proteobacteria;c__Alphaproteobacteria;o__Rhizobiales;f__Bradyrhizobiaceae;g__               | 0     | 0.001 | 0     | 0     | 0     | 0     | 0.001 | 0.002 | 0.001 | 0     | 0     | 0.001 |
| k__Bacteria;p__Proteobacteria;c__Alphaproteobacteria;o__Rhizobiales;f__Bradyrhizobiaceae;g__Balneimonas    | 0     | 0     | 0.002 | 0     | 0     | 0     | 0     | 0     | 0.001 | 0     | 0.006 | 0     |
| k__Bacteria;p__Proteobacteria;c__Alphaproteobacteria;o__Rhizobiales;f__Bradyrhizobiaceae;g__Bosea          | 0     | 0.004 | 0     | 0     | 0     | 0.001 | 0.006 | 0.001 | 0.001 | 0     | 0.001 | 0.002 |
| k__Bacteria;p__Proteobacteria;c__Alphaproteobacteria;o__Rhizobiales;f__Bradyrhizobiaceae;g__Bradyrhizobium | 0.004 | 0.005 | 0.001 | 0.002 | 0.004 | 0.003 | 0.022 | 0.092 | 0.013 | 0.023 | 0.02  | 0.025 |
| k__Bacteria;p__Proteobacteria;c__Alphaproteobacteria;o__Rhizobiales;f__Hyphomicrobiaceae;Other             | 0     | 0     | 0     | 0     | 0     | 0     | 0     | 0     | 0     | 0     | 0     | 0.001 |
| k__Bacteria;p__Proteobacteria;c__Alphaproteobacteria;o__Rhizobiales;f__Hyphomicrobiaceae;g__Devosia        | 0     | 0.002 | 0.002 | 0.001 | 0     | 0.001 | 0     | 0     | 0.004 | 0.001 | 0.005 | 0     |

|                                                                                                                |       |       |       |       |       |       |       |       |       |       |       |       |
|----------------------------------------------------------------------------------------------------------------|-------|-------|-------|-------|-------|-------|-------|-------|-------|-------|-------|-------|
| k__Bacteria;p__Proteobacteria;c__Alphaproteobacteria;o__Rhizobiales;f__Hyphomicrobiaceae;g__Hyphomicrobium     | 0     | 0     | 0     | 0     | 0     | 0.001 | 0     | 0.002 | 0     | 0.001 | 0.002 | 0     |
| k__Bacteria;p__Proteobacteria;c__Alphaproteobacteria;o__Rhizobiales;f__Hyphomicrobiaceae;g__Rhodoplanes        | 0     | 0     | 0     | 0     | 0     | 0     | 0     | 0     | 0.001 | 0     | 0.003 | 0     |
| k__Bacteria;p__Proteobacteria;c__Alphaproteobacteria;o__Rhizobiales;f__Methylobacteriaceae;Other               | 0     | 0.001 | 0.002 | 0.001 | 0.001 | 0     | 0.004 | 0.004 | 0.001 | 0.003 | 0.007 | 0.004 |
| k__Bacteria;p__Proteobacteria;c__Alphaproteobacteria;o__Rhizobiales;f__Methylobacteriaceae;g__                 | 0     | 0.003 | 0.003 | 0.002 | 0.001 | 0.002 | 0.008 | 0.005 | 0.002 | 0.002 | 0.025 | 0.013 |
| k__Bacteria;p__Proteobacteria;c__Alphaproteobacteria;o__Rhizobiales;f__Methylobacteriaceae;g__Methylobacterium | 0.001 | 0.01  | 0.014 | 0.008 | 0.013 | 0.008 | 0.036 | 0.024 | 0.006 | 0.015 | 0.026 | 0.016 |
| k__Bacteria;p__Proteobacteria;c__Alphaproteobacteria;o__Rhizobiales;f__Methylocystaceae;Other                  | 0     | 0     | 0     | 0     | 0     | 0.001 | 0.003 | 0     | 0     | 0     | 0     | 0     |
| k__Bacteria;p__Proteobacteria;c__Alphaproteobacteria;o__Rhizobiales;f__Methylocystaceae;g__                    | 0.001 | 0     | 0     | 0     | 0.01  | 0.006 | 0.026 | 0.049 | 0     | 0.011 | 0.003 | 0.01  |
| k__Bacteria;p__Proteobacteria;c__Alphaproteobacteria;o__Rhizobiales;f__Methylocystaceae;g__Methylopila         | 0     | 0     | 0     | 0     | 0     | 0     | 0     | 0     | 0.001 | 0     | 0.002 | 0     |
| k__Bacteria;p__Proteobacteria;c__Alphaproteobacteria;o__Rhizobiales;f__Phyllobacteriaceae;Other                | 0     | 0.001 | 0.001 | 0     | 0     | 0     | 0.001 | 0     | 0.003 | 0.003 | 0.003 | 0     |
| k__Bacteria;p__Proteobacteria;c__Alphaproteobacteria;o__Rhizobiales;f__Phyllobacteriaceae;g__Aminobacter       | 0     | 0     | 0     | 0     | 0     | 0     | 0.001 | 0     | 0.001 | 0.001 | 0     | 0     |
| k__Bacteria;p__Proteobacteria;c__Alphaproteobacteria;o__Rhizobiales;f__Phyllobacteriaceae;g__Mesorhizobium     | 0.002 | 0     | 0.002 | 0     | 0     | 0     | 0     | 0     | 0.002 | 0.003 | 0.005 | 0     |
| k__Bacteria;p__Proteobacteria;c__Alphaproteobacteria;o__Rhizobiales;f__Rhizobiaceae;Other                      | 0.003 | 0.002 | 0.001 | 0     | 0.001 | 0     | 0.001 | 0     | 0.002 | 0.001 | 0.003 | 0.002 |
| k__Bacteria;p__Proteobacteria;c__Alphaproteobacteria;o__Rhizobiales;f__Rhizobiaceae;g__Agrobacterium           | 0     | 0     | 0     | 0     | 0     | 0.001 | 0.001 | 0     | 0.002 | 0     | 0     | 0     |



|                                                                                                                 |       |       |       |       |       |       |       |       |       |       |       |       |
|-----------------------------------------------------------------------------------------------------------------|-------|-------|-------|-------|-------|-------|-------|-------|-------|-------|-------|-------|
| k__Bacteria;p__Proteobacteria;c__Alphaproteobacteria;o__Rhizobiales;f__Rhizobiaceae;g__Kaistia                  | 0     | 0     | 0     | 0     | 0     | 0     | 0.001 | 0     | 0     | 0     | 0     | 0     |
| k__Bacteria;p__Proteobacteria;c__Alphaproteobacteria;o__Rhizobiales;f__Rhizobiaceae;g__Shinella                 | 0     | 0     | 0     | 0.003 | 0     | 0     | 0     | 0.002 | 0     | 0     | 0     | 0.004 |
| k__Bacteria;p__Proteobacteria;c__Alphaproteobacteria;o__Rhizobiales;f__Xanthobacteraceae;Other                  | 0     | 0     | 0     | 0     | 0     | 0     | 0     | 0.001 | 0     | 0     | 0     | 0     |
| k__Bacteria;p__Proteobacteria;c__Alphaproteobacteria;o__Rhizobiales;f__Xanthobacteraceae;g__Labrys              | 0.001 | 0     | 0     | 0     | 0     | 0     | 0.001 | 0.011 | 0     | 0.002 | 0.001 | 0.002 |
| k__Bacteria;p__Proteobacteria;c__Alphaproteobacteria;o__Rhodobacterales;f__Hyphomonadaceae;g__                  | 0     | 0     | 0     | 0     | 0     | 0     | 0.002 | 0     | 0     | 0.002 | 0.003 | 0     |
| k__Bacteria;p__Proteobacteria;c__Alphaproteobacteria;o__Rhodobacterales;f__Rhodobacteraceae;g__Rubellimicrobium | 0     | 0     | 0.002 | 0     | 0     | 0     | 0     | 0     | 0     | 0     | 0.003 | 0     |
| k__Bacteria;p__Proteobacteria;c__Alphaproteobacteria;o__Rhodospirillales;Other;Other                            | 0.001 | 0     | 0     | 0     | 0     | 0     | 0     | 0     | 0     | 0     | 0     | 0     |
| k__Bacteria;p__Proteobacteria;c__Alphaproteobacteria;o__Rhodospirillales;f__g__                                 | 0     | 0     | 0     | 0     | 0     | 0     | 0     | 0     | 0.001 | 0     | 0     | 0     |
| k__Bacteria;p__Proteobacteria;c__Alphaproteobacteria;o__Rhodospirillales;f__Acetobacteraceae;Other              | 0     | 0     | 0.002 | 0.001 | 0     | 0.001 | 0.002 | 0.002 | 0.001 | 0.003 | 0.006 | 0     |
| k__Bacteria;p__Proteobacteria;c__Alphaproteobacteria;o__Rhodospirillales;f__Acetobacteraceae;g__                | 0.004 | 0     | 0     | 0.002 | 0.004 | 0.002 | 0.024 | 0.019 | 0.003 | 0.008 | 0.008 | 0.006 |
| k__Bacteria;p__Proteobacteria;c__Alphaproteobacteria;o__Rhodospirillales;f__Acetobacteraceae;g__Roseomonas      | 0     | 0     | 0.001 | 0     | 0     | 0     | 0.001 | 0     | 0.001 | 0     | 0.002 | 0     |
| k__Bacteria;p__Proteobacteria;c__Alphaproteobacteria;o__Rhodospirillales;f__Rhodospirillaceae;g__               | 0     | 0     | 0     | 0     | 0     | 0     | 0     | 0.001 | 0.001 | 0     | 0     | 0.001 |
| k__Bacteria;p__Proteobacteria;c__Alphaproteobacteria;o__Rickettsiales;Other;Other                               | 0     | 0.006 | 0.002 | 0     | 0     | 0.001 | 0     | 0     | 0.001 | 0.001 | 0     | 0     |
| k__Bacteria;p__Proteobacteria;c__Alphaproteobacteria;o__Rickettsiales;f__g__                                    | 0     | 0.603 | 0.245 | 0     | 0     | 0.576 | 0.001 | 0.001 | 0     | 0.138 | 0     | 0     |

|                                                                                                                  |       |       |       |       |       |       |       |       |       |       |       |       |
|------------------------------------------------------------------------------------------------------------------|-------|-------|-------|-------|-------|-------|-------|-------|-------|-------|-------|-------|
| k__Bacteria;p__Proteobacteria;c__Alphaproteobacteria;o__Rickettsiales;f__Anaplasmataceae;g__Ehrlichia            | 0     | 0     | 0     | 0     | 0     | 0     | 0     | 0     | 0.058 | 0     | 0     | 0     |
| k__Bacteria;p__Proteobacteria;c__Alphaproteobacteria;o__Rickettsiales;f__Rickettsiaceae;Other                    | 0.001 | 0.001 | 0.003 | 0.003 | 0     | 0.001 | 0     | 0     | 0.001 | 0.002 | 0     | 0     |
| k__Bacteria;p__Proteobacteria;c__Alphaproteobacteria;o__Rickettsiales;f__Rickettsiaceae;g__Rickettsia            | 0.872 | 0.162 | 0.395 | 0.746 | 0.411 | 0.25  | 0.003 | 0     | 0.539 | 0.313 | 0.004 | 0.463 |
| k__Bacteria;p__Proteobacteria;c__Alphaproteobacteria;o__Sphingomonadales;Other;Other                             | 0.002 | 0.006 | 0.02  | 0.004 | 0.018 | 0.001 | 0.008 | 0.005 | 0.002 | 0.003 | 0.004 | 0.001 |
| k__Bacteria;p__Proteobacteria;c__Alphaproteobacteria;o__Sphingomonadales;f__g__                                  | 0     | 0     | 0     | 0     | 0     | 0     | 0     | 0     | 0     | 0     | 0.006 | 0     |
| k__Bacteria;p__Proteobacteria;c__Alphaproteobacteria;o__Sphingomonadales;f__Erythrobacteraceae;g__               | 0     | 0     | 0     | 0     | 0     | 0     | 0.001 | 0     | 0     | 0     | 0     | 0     |
| k__Bacteria;p__Proteobacteria;c__Alphaproteobacteria;o__Sphingomonadales;f__Sphingomonadaceae;Other              | 0.009 | 0.008 | 0.022 | 0.02  | 0.121 | 0.006 | 0.143 | 0.04  | 0.027 | 0.036 | 0.107 | 0.021 |
| k__Bacteria;p__Proteobacteria;c__Alphaproteobacteria;o__Sphingomonadales;f__Sphingomonadaceae;g__                | 0     | 0.001 | 0.001 | 0     | 0     | 0.001 | 0.027 | 0.001 | 0.005 | 0.002 | 0.015 | 0.001 |
| k__Bacteria;p__Proteobacteria;c__Alphaproteobacteria;o__Sphingomonadales;f__Sphingomonadaceae;g__Kaistobacter    | 0     | 0     | 0.001 | 0     | 0     | 0     | 0.01  | 0     | 0     | 0     | 0.018 | 0     |
| k__Bacteria;p__Proteobacteria;c__Alphaproteobacteria;o__Sphingomonadales;f__Sphingomonadaceae;g__Novosphingobium | 0     | 0.001 | 0.001 | 0     | 0.001 | 0     | 0.001 | 0.001 | 0     | 0.011 | 0.008 | 0.002 |
| k__Bacteria;p__Proteobacteria;c__Alphaproteobacteria;o__Sphingomonadales;f__Sphingomonadaceae;g__Sphingobium     | 0     | 0.001 | 0.002 | 0     | 0     | 0     | 0.007 | 0.001 | 0.003 | 0.001 | 0.003 | 0     |
| k__Bacteria;p__Proteobacteria;c__Alphaproteobacteria;o__Sphingomonadales;f__Sphingomonadaceae;g__Sphingomonas    | 0.002 | 0.002 | 0.008 | 0.055 | 0.092 | 0.013 | 0.164 | 0.07  | 0.047 | 0.062 | 0.121 | 0.048 |
| k__Bacteria;p__Proteobacteria;c__Betaproteobacteria;Other;Other;Other                                            | 0     | 0.001 | 0.002 | 0     | 0     | 0     | 0.005 | 0     | 0.001 | 0.001 | 0.004 | 0     |
| k__Bacteria;p__Proteobacteria;c__Betaproteobacteria                                                              | 0     | 0     | 0     | 0     | 0     | 0     | 0     | 0     | 0     | 0     | 0.002 | 0     |

|                                                                                                            |       |       |       |       |       |       |       |       |       |       |       |       |
|------------------------------------------------------------------------------------------------------------|-------|-------|-------|-------|-------|-------|-------|-------|-------|-------|-------|-------|
| ria;o__;f__;g__                                                                                            |       |       |       |       |       |       |       |       |       |       |       |       |
| k__Bacteria;p__Proteobacteria;c__Betaproteobacteria;o__Burkholderiales;Other;Other                         | 0     | 0     | 0.002 | 0.001 | 0.001 | 0     | 0.01  | 0.008 | 0     | 0.004 | 0.003 | 0.001 |
| k__Bacteria;p__Proteobacteria;c__Betaproteobacteria;o__Burkholderiales;f__;g__                             | 0     | 0     | 0     | 0     | 0     | 0     | 0.001 | 0     | 0     | 0.002 | 0     | 0.001 |
| k__Bacteria;p__Proteobacteria;c__Betaproteobacteria;o__Burkholderiales;f__Burkholderiaceae;Other           | 0     | 0     | 0     | 0.001 | 0.001 | 0     | 0.001 | 0.005 | 0     | 0.002 | 0.002 | 0.001 |
| k__Bacteria;p__Proteobacteria;c__Betaproteobacteria;o__Burkholderiales;f__Burkholderiaceae;g__Burkholderia | 0.002 | 0.002 | 0.001 | 0.004 | 0.002 | 0.003 | 0.001 | 0.025 | 0     | 0.004 | 0     | 0.007 |
| k__Bacteria;p__Proteobacteria;c__Betaproteobacteria;o__Burkholderiales;f__Comamonadaceae;Other             | 0.004 | 0     | 0.01  | 0     | 0.001 | 0.003 | 0.011 | 0.002 | 0.01  | 0.004 | 0.021 | 0.01  |
| k__Bacteria;p__Proteobacteria;c__Betaproteobacteria;o__Burkholderiales;f__Comamonadaceae;g__               | 0     | 0     | 0     | 0     | 0     | 0     | 0.001 | 0     | 0     | 0     | 0     | 0     |
| k__Bacteria;p__Proteobacteria;c__Betaproteobacteria;o__Burkholderiales;f__Comamonadaceae;g__Comamonas      | 0     | 0     | 0     | 0     | 0     | 0     | 0     | 0     | 0     | 0     | 0.001 | 0     |
| k__Bacteria;p__Proteobacteria;c__Betaproteobacteria;o__Burkholderiales;f__Comamonadaceae;g__Methylibium    | 0.001 | 0.001 | 0.004 | 0     | 0     | 0.001 | 0.012 | 0.007 | 0.005 | 0.008 | 0.033 | 0.002 |
| k__Bacteria;p__Proteobacteria;c__Betaproteobacteria;o__Burkholderiales;f__Comamonadaceae;g__Pelomonas      | 0     | 0     | 0     | 0     | 0     | 0     | 0     | 0     | 0     | 0     | 0     | 0.002 |
| k__Bacteria;p__Proteobacteria;c__Betaproteobacteria;o__Burkholderiales;f__Comamonadaceae;g__Rhodoferax     | 0     | 0     | 0.001 | 0     | 0     | 0     | 0.001 | 0     | 0.001 | 0.001 | 0.002 | 0     |
| k__Bacteria;p__Proteobacteria;c__Betaproteobacteria;o__Burkholderiales;f__Comamonadaceae;g__Rubrivivax     | 0     | 0     | 0     | 0     | 0     | 0     | 0     | 0     | 0     | 0     | 0.001 | 0     |
| k__Bacteria;p__Proteobacteria;c__Betaproteobacteria;o__Burkholderiales;f__Comamonadaceae;g__Variovorax     | 0     | 0.003 | 0.01  | 0.006 | 0     | 0.001 | 0.005 | 0.009 | 0.013 | 0.003 | 0.004 | 0.006 |
| k__Bacteria;p__Proteobacteria;c__Betaproteobacteria;o__Burkholderiales;f__Oxalobacteraceae;Other           | 0.001 | 0     | 0.001 | 0.011 | 0     | 0     | 0     | 0     | 0     | 0.001 | 0.001 | 0     |

|                                                                                                                 |       |       |       |       |       |   |       |       |       |       |       |       |       |
|-----------------------------------------------------------------------------------------------------------------|-------|-------|-------|-------|-------|---|-------|-------|-------|-------|-------|-------|-------|
| k__Bacteria;p__Proteobacteria;c__Betaproteobacteria;o__Burkholderiales;f__Oxalobacteraceae;g__                  | 0     | 0     | 0     | 0     | 0     | 0 | 0     | 0     | 0     | 0.001 | 0     | 0     | 0     |
| k__Bacteria;p__Proteobacteria;c__Betaproteobacteria;o__Burkholderiales;f__Oxalobacteraceae;g__Janthinobacterium | 0     | 0     | 0     | 0.005 | 0.001 | 0 | 0.001 | 0.001 | 0.001 | 0.001 | 0     | 0.003 | 0     |
| k__Bacteria;p__Proteobacteria;c__Betaproteobacteria;o__Burkholderiales;f__Oxalobacteraceae;g__Ralstonia         | 0     | 0     | 0     | 0     | 0     | 0 | 0     | 0     | 0     | 0     | 0.001 | 0     | 0     |
| k__Bacteria;p__Proteobacteria;c__Betaproteobacteria;o__SC-I-84;f__g__                                           | 0     | 0     | 0     | 0     | 0     | 0 | 0     | 0     | 0     | 0     | 0     | 0.001 | 0     |
| k__Bacteria;p__Proteobacteria;c__Deltaproteobacteria;o__Bdellovibrionales;f__Bdellovibrionaceae;g__Bdellovibrio | 0     | 0     | 0     | 0.002 | 0     | 0 | 0.001 | 0.001 | 0.002 | 0.002 | 0     | 0     | 0     |
| k__Bacteria;p__Proteobacteria;c__Deltaproteobacteria;o__MIZ46;f__g__                                            | 0     | 0     | 0     | 0     | 0     | 0 | 0     | 0     | 0.001 | 0     | 0.001 | 0     | 0     |
| k__Bacteria;p__Proteobacteria;c__Deltaproteobacteria;o__Myxococcales;Other;Other                                | 0     | 0     | 0     | 0     | 0     | 0 | 0     | 0     | 0.008 | 0     | 0     | 0     | 0     |
| k__Bacteria;p__Proteobacteria;c__Deltaproteobacteria;o__Myxococcales;f__g__                                     | 0     | 0.001 | 0     | 0     | 0     | 0 | 0.001 | 0.001 | 0     | 0.005 | 0.003 | 0     | 0     |
| k__Bacteria;p__Proteobacteria;c__Deltaproteobacteria;o__Myxococcales;f__Polyangiaceae;Other                     | 0     | 0     | 0     | 0     | 0.004 | 0 | 0     | 0     | 0     | 0     | 0     | 0     | 0     |
| k__Bacteria;p__Proteobacteria;c__Deltaproteobacteria;o__Spirobacillales;f__g__                                  | 0     | 0     | 0     | 0     | 0     | 0 | 0.001 | 0     | 0     | 0.001 | 0     | 0     | 0     |
| k__Bacteria;p__Proteobacteria;c__Gammaproteobacteria;Other;Other;Other                                          | 0.001 | 0.003 | 0.003 | 0     | 0     | 0 | 0     | 0     | 0.001 | 0.001 | 0.002 | 0     | 0     |
| k__Bacteria;p__Proteobacteria;c__Gammaproteobacteria;o__Enterobacteriales;f__Enterobacteriaceae;Other           | 0     | 0     | 0     | 0     | 0     | 0 | 0     | 0     | 0     | 0     | 0     | 0.001 | 0     |
| k__Bacteria;p__Proteobacteria;c__Gammaproteobacteria;o__Legionellales;f__g__                                    | 0     | 0     | 0     | 0     | 0     | 0 | 0     | 0     | 0     | 0.001 | 0     | 0     | 0     |
| k__Bacteria;p__Proteobacteria;c__Gammaproteobacteria;o__Legionellales;f__Coxiellaceae;g__Coxiella               | 0.013 | 0.023 | 0.006 | 0.003 | 0     | 0 | 0.005 | 0.002 | 0.004 | 0.002 | 0.001 | 0.002 | 0.002 |

|                                                                                                                 |   |       |   |   |   |       |       |       |       |       |       |       |
|-----------------------------------------------------------------------------------------------------------------|---|-------|---|---|---|-------|-------|-------|-------|-------|-------|-------|
| k__Bacteria;p__Proteobacteria;c__Gammaproteobacteria;o__Pseudomonadales;f__Pseudomonadaceae;Other               | 0 | 0     | 0 | 0 | 0 | 0     | 0     | 0     | 0     | 0.003 | 0     | 0     |
| k__Bacteria;p__Proteobacteria;c__Gammaproteobacteria;o__Pseudomonadales;f__Pseudomonadaceae;g__Pseudomonas      | 0 | 0     | 0 | 0 | 0 | 0     | 0.002 | 0.002 | 0.002 | 0.003 | 0.002 | 0.001 |
| k__Bacteria;p__Proteobacteria;c__Gammaproteobacteria;o__Xanthomonadales;Other;Other                             | 0 | 0     | 0 | 0 | 0 | 0     | 0     | 0.001 | 0     | 0     | 0     | 0     |
| k__Bacteria;p__Proteobacteria;c__Gammaproteobacteria;o__Xanthomonadales;f__Sinobacteraceae;g__                  | 0 | 0     | 0 | 0 | 0 | 0     | 0     | 0     | 0     | 0.002 | 0     | 0.004 |
| k__Bacteria;p__Proteobacteria;c__Gammaproteobacteria;o__Xanthomonadales;f__Sinobacteraceae;g__Hydrocarboniphaga | 0 | 0     | 0 | 0 | 0 | 0.001 | 0     | 0     | 0.001 | 0     | 0     | 0.005 |
| k__Bacteria;p__Proteobacteria;c__Gammaproteobacteria;o__Xanthomonadales;f__Xanthomonadaceae;Other               | 0 | 0     | 0 | 0 | 0 | 0     | 0     | 0     | 0     | 0     | 0     | 0.004 |
| k__Bacteria;p__Proteobacteria;c__Gammaproteobacteria;o__Xanthomonadales;f__Xanthomonadaceae;g__                 | 0 | 0     | 0 | 0 | 0 | 0     | 0     | 0     | 0     | 0.004 | 0.001 | 0.006 |
| k__Bacteria;p__Proteobacteria;c__Gammaproteobacteria;o__Xanthomonadales;f__Xanthomonadaceae;g__Dokdonella       | 0 | 0     | 0 | 0 | 0 | 0     | 0     | 0     | 0     | 0     | 0     | 0.001 |
| k__Bacteria;p__Proteobacteria;c__Gammaproteobacteria;o__Xanthomonadales;f__Xanthomonadaceae;g__Dyella           | 0 | 0     | 0 | 0 | 0 | 0     | 0     | 0     | 0.001 | 0.003 | 0     | 0.008 |
| k__Bacteria;p__Proteobacteria;c__Gammaproteobacteria;o__Xanthomonadales;f__Xanthomonadaceae;g__Luteibacter      | 0 | 0.001 | 0 | 0 | 0 | 0     | 0     | 0.006 | 0     | 0     | 0     | 0.004 |
| k__Bacteria;p__Proteobacteria;c__Gammaproteobacteria;o__Xanthomonadales;f__Xanthomonadaceae;g__Thermomonas      | 0 | 0     | 0 | 0 | 0 | 0     | 0     | 0     | 0     | 0     | 0.001 | 0     |
| k__Bacteria;p__Spirochaetes;c__Spirochaetes;o__[Borreliales];f__[Borreliaceae];g__Borrelia                      | 0 | 0     | 0 | 0 | 0 | 0     | 0     | 0     | 0     | 0     | 0.013 | 0     |
| k__Bacteria;p__TM6;c__SJA-4;o__f__g__                                                                           | 0 | 0     | 0 | 0 | 0 | 0     | 0     | 0     | 0.003 | 0     | 0     | 0     |
| k__Bacteria;p__TM7;c__SC3;o__f__g__                                                                             | 0 | 0     | 0 | 0 | 0 | 0     | 0.001 | 0     | 0     | 0     | 0     | 0     |

|                                                                                                                       |   |       |       |       |       |   |       |       |       |       |       |       |
|-----------------------------------------------------------------------------------------------------------------------|---|-------|-------|-------|-------|---|-------|-------|-------|-------|-------|-------|
| k__Bacteria;p__TM7;c__TM7-1;o__;f__;g__                                                                               | 0 | 0     | 0.003 | 0     | 0.001 | 0 | 0.001 | 0     | 0.005 | 0.001 | 0.002 | 0.002 |
| k__Bacteria;p__TM7;c__TM7-3;Other;Other;Other                                                                         | 0 | 0     | 0     | 0     | 0     | 0 | 0     | 0.001 | 0     | 0     | 0     | 0     |
| k__Bacteria;p__TM7;c__TM7-3;o__;f__;g__                                                                               | 0 | 0     | 0.001 | 0     | 0     | 0 | 0     | 0     | 0.001 | 0     | 0     | 0     |
| k__Bacteria;p__TM7;c__TM7-3;o__Blgi18;f__;g__                                                                         | 0 | 0     | 0     | 0     | 0     | 0 | 0     | 0     | 0.001 | 0     | 0     | 0     |
| k__Bacteria;p__TM7;c__TM7-3;o__EW055;f__;g__                                                                          | 0 | 0     | 0     | 0     | 0     | 0 | 0     | 0     | 0.002 | 0     | 0     | 0     |
| k__Bacteria;p__Verrucomicrobia;Other;Other;Other;Other                                                                | 0 | 0     | 0     | 0     | 0     | 0 | 0.001 | 0     | 0.001 | 0.002 | 0     | 0.001 |
| k__Bacteria;p__Verrucomicrobia;c__Verrucomicrobiae;o__Verrucomicrobiales;f__Verrucomicrobiaceae;g__                   | 0 | 0     | 0     | 0     | 0     | 0 | 0     | 0     | 0.001 | 0     | 0     | 0.003 |
| k__Bacteria;p__Verrucomicrobia;c__Verrucomicrobiae;o__Verrucomicrobiales;f__Verrucomicrobiaceae;g__Luteolibacter      | 0 | 0     | 0     | 0     | 0     | 0 | 0     | 0     | 0     | 0     | 0.001 | 0     |
| k__Bacteria;p__Verrucomicrobia;c__[Spartobacteria];o__[Chthoniobacterales];f__[Chthoniobacteraceae];Other             | 0 | 0     | 0     | 0     | 0     | 0 | 0.001 | 0     | 0     | 0     | 0.001 | 0.002 |
| k__Bacteria;p__Verrucomicrobia;c__[Spartobacteria];o__[Chthoniobacterales];f__[Chthoniobacteraceae];g__Chthoniobacter | 0 | 0     | 0     | 0.001 | 0     | 0 | 0     | 0.001 | 0     | 0     | 0     | 0.001 |
| k__Bacteria;p__Verrucomicrobia;c__[Spartobacteria];o__[Chthoniobacterales];f__[Chthoniobacteraceae];g__Ellin506       | 0 | 0     | 0     | 0     | 0     | 0 | 0.001 | 0     | 0     | 0.001 | 0.001 | 0.002 |
| k__Bacteria;p__WPS-2;c__;o__;f__;g__                                                                                  | 0 | 0.001 | 0     | 0.001 | 0     | 0 | 0     | 0     | 0     | 0     | 0     | 0.001 |
